# Supplementary material for: Trends and prevalence of overweight and obesity in primary school aged children in the Republic of Ireland from 2002-2012: a systematic review
Source: BMC Public Health. 2014 Oct 14;14:974. doi: 10.1186/1471-2458-14-974 (PMC4197331; doi:10.1186/1471-2458-14-974)
Supplement: Supplementary file 1 — Additional file 1: Supplementary information on the search strategy for a systematic review. (PDF 494 KB) [file 12889_2014_7148_MOESM1_ESM.pdf]

## **Supplementary information on the search strategy for a systematic review**

### **Title**

Trends and prevalence of overweight and obesity in primary school aged children in the Republic of Ireland from 2002-2012: a systematic review

### **Authors**

Ms. Eimear Keane

Prof. Patricia M Kearney

Prof. Ivan J Perry

Prof. Cecily C Kelleher

Dr. Janas M Harrington

**ADDITIONAL FILE 1A: SEARCH STRATEGY FOR MEDLINE (SEARCHED UP TO AND INCLUDING 31 MAY 2013)**

1. Obesity (MeSH)
2. Overweight (MeSH)
3. Obese
4. Body Mass Index (MeSH)
5. BMI
6. Child (MeSH)
7. Child\*
8. School children
9. Schoolchildren
10. Pediatr\*
11. Paediatr\*
12. Boys
13. Girls
14. Prevalence (MeSH)
15. Rate
16. Trend
17. Increase
18. Decrease
19. Ireland (MeSH)
20. Irish
21. 1 OR 2 OR 3 OR 4 OR 5
22. 6 OR 7 OR 8 OR 9 OR 10 OR 11 OR 12 OR 13
23. 14 OR 15 OR 16 OR 17 OR 18
24. 19 OR 20
25. 21 OR 22 OR 23 OR 24 (Limits: date of publication: 20020101-20130631; Age related: Child, Preschool: 2-5 years, Child: 6-12 years)

**Results: 19**

**ADDITIONAL FILE 1B: SEARCH STRATEGY FOR CINAHL (SEARCHED UP TO AND INCLUDING 31 MAY 2013)**

1. Obesity (MeSH)
2. Overweight
3. Obese
4. BMI
5. Body Mass Index (MeSH)
6. Schoolchildren
7. School children
8. Child\*
9. Pediatr\*
10. Paediatr\*
11. Boys
12. Girls
13. Prevalence (MeSH)
14. Rate
15. Trend
16. Increase
17. Decrease
18. Ireland (MeSH)
19. Irish
20. 1 OR 2 OR 3 OR 4 OR 5
21. 6 OR 7 OR 8 OR 9 OR 10 OR 11 OR 12
22. 13 OR 15 OR 16 OR 17 OR 17
23. 18 OR 19
24. 20 OR 21 OR 22 OR 23 (Limits: Age related: Child, Preschool: 2-5 years, Child: 6-12 years)

**Results: 4**

**ADDITIONAL FILE 1C: SEARCH STRATEGY FOR EMBASE (SEARCHED UP TO AND INCLUDING 31 MAY 2013)**

1. 'Obesity' /exp OR obesity
2. 'Overweight' / exp OR overweight
3. Obese
4. BMI
5. 'Body Mass Index' /exp OR 'body mass index'
6. 'Children' / exp OR children
7. 'Child' /exp OR child
8. 'Schoolchildren' / exp OR schoolchildren
9. 'School children' / exp OR 'school children'
10. Pediatr\*
11. Paediatr\*
12. Boys
13. Girls
14. 'Prevalence' /exp OR prevalence
15. Rate
16. Trend
17. Increase
18. Decrease
19. 'Ireland' /exp OR ireland
20. Irish
21. 1 OR 2 OR 3 OR 4 OR 5
22. 6 OR 7 OR 8 OR 9 OR 10 OR 11 OR 12 OR 13
23. 14 OR 15 OR 16 OR 17 OR 18
24. 19 OR 20
25. 21 OR 22 OR 23 OR 24 (Limits: ([school]/lim OR [child]/lim) AND [2002-2013]/py

**Results: 285**

**ADDITIONAL FILE 1D: SEARCH STRATEGY FOR ACADEMIC SEARCH COMPLETE (SEARCHED UP TO AND INCLUDING 31 MAY 2013)**

1. Obesity
2. Overweight
3. Obese
4. BMI
5. Body Mass Index
6. Child\*
7. Schoolchildren
8. School children
9. Pediatr\*
10. Paediatr\*
11. Boys
12. Girls
13. Prevalence
14. Rate
15. Trend
16. Increase
17. Decrease
18. Ireland
29. Irish
20. 1 OR 2 OR 3 OR 4 OR 5
21. 6 OR 7 OR 8 OR 9 OR 10 OR 11 OR 12
22. 13 OR 14 OR 15 OR 16 OR 17
23. 18 OR 19
24. 20 OR 21 OR 22 OR 23 (Limits: date of publication: 20020101-20130631)

**Results: 227**

# **ADDITIONAL FILE 1E: SEARCH OF ‘OTHER’ SOURCES**

| Source                                                                                                                 | Methods                                                                                                                                                                                                                                                                                                                                                                                                                                                                                                                                             | Results                                |
|------------------------------------------------------------------------------------------------------------------------|-----------------------------------------------------------------------------------------------------------------------------------------------------------------------------------------------------------------------------------------------------------------------------------------------------------------------------------------------------------------------------------------------------------------------------------------------------------------------------------------------------------------------------------------------------|----------------------------------------|
| <b>Source 1</b><br>Authors of this systematic reviews had knowledge of potentially relevant data sources               | The authors of this review were aware of grey literature potentially relevant to this systematic review                                                                                                                                                                                                                                                                                                                                                                                                                                             | 2 potentially relevant sources located |
| <b>Source 2</b><br>Google search on <a href="http://www.google.ie">www.google.ie</a> (searched on 31 May 2013)         | Search terms used: prevalence, child, obesity, Ireland<br>Limits: .ie websites searched only<br>The first 20 pages were searched only                                                                                                                                                                                                                                                                                                                                                                                                               | 1 potentially relevant source located  |
| <b>Source 3</b><br>Publically available Irish databases or national agencies websites (searched in April and May 2013) | Websites searched:<br>(1) Irish Social Science Data Archive ( <a href="http://www.ucd.ie/issda/">http://www.ucd.ie/issda/</a> )<br>(2) Safefood ( <a href="http://www.safefood.eu/Home">http://www.safefood.eu/Home</a> )<br>(3) The Health Well ( <a href="http://www.thehealthwell.info/">http://www.thehealthwell.info/</a> )<br>(4) Department of Health and Children’s Irish child health database ( <a href="http://www.childrensdatabase.ie/irish-child-health-database/">http://www.childrensdatabase.ie/irish-child-health-database/</a> ) | 0 potentially relevant sources located |
| <b>Source 4</b><br>Contact with obesity experts in Ireland                                                             | 1. An announcement was made at an Irish obesity action forum meeting held in June 2013<br>( <a href="http://www.safefood.eu/Professional/Nutrition/All-island-Obesity-Action-Forum.aspx">http://www.safefood.eu/Professional/Nutrition/All-island-Obesity-Action-Forum.aspx</a> )<br>2. An email was sent to 6 obesity experts in Ireland. All 6 experts replied and many forwarded the original email to colleagues                                                                                                                                | 7 potentially relevant sources located |
| <b>Source 5</b><br>Reference searching of included papers                                                              | The reference section of each included paper was assessed for potentially relevant literature                                                                                                                                                                                                                                                                                                                                                                                                                                                       | 1 potentially relevant source located  |
|                                                                                                                        |                                                                                                                                                                                                                                                                                                                                                                                                                                                                                                                                                     | 11 potentially relevant source located |

**Footnote:** Potentially relevant literature had titles/abstracts screened and if relevant the full document was read for inclusion in the systematic review.

**ADDITIONAL FILE 1F: TABLE OF EXCLUDED STUDIES**

| <b>Study</b>             | <b>Detail</b>                              |
|--------------------------|--------------------------------------------|
| Griffin et al., 2004 [1] | Data for study was collected prior to 2002 |
| Coulter & Woods, 2011[2] | No prevalence estimates available          |
| Murphy, 2005 [3]         | No prevalence estimates available          |
| Finucane, 2009 [4]       | No prevalence estimates available          |

## REFERENCES

1. Griffin AC, Younger KM, Flynn MAT: **Assessment of obesity and fear of fatness among inner-city Dublin schoolchildren in a one-year follow-up study.** *Public health nutrition* 2004, **7**(6):729-735.
2. Coulter M, Woods CB: **An exploration of children's perceptions and enjoyment of school-based physical activity and physical education.** *Journal of physical activity & health* 2011, **8**(5):645-654.
3. Murphy JFA: **The National Taskforce on Obesity.** *Irish Medical Journal* 2005, **98**(5):132-132.
4. Finucane F: **Obesity in Irish youth: epidemiology and implications.** *Irish Journal of Medical Science* 2009, **178**(3):249-255.
